# Three Distinct Two-Component Systems Are Involved in Resistance to the Class I Bacteriocins, Nukacin ISK-1 and Nisin A, in *Staphylococcus aureus*

Miki Kawada-Matsuo<sup>1</sup>\*, Yuuma Yoshida<sup>1,2</sup>\*, Takeshi Zendo<sup>3</sup>, Junichi Nagao<sup>4</sup>, Yuichi Oogai<sup>1</sup>, Yasunori Nakamura<sup>2</sup>, Kenji Sonomoto<sup>3</sup>, Norifumi Nakamura<sup>2</sup>, Hitoshi Komatsuzawa<sup>1\*</sup>

**1** Department of Oral Microbiology, Kagoshima University Graduate School of Medical and Dental Sciences, Kagoshima, Japan, **2** Department of Oral and Maxillofacial Surgery, Kagoshima University Graduate School of Medical and Dental Sciences, Kagoshima, Japan, **3** Laboratory of Microbial Technology, Division of Applied Molecular Microbiology and Biomass Chemistry, Department of Bioscience and Biotechnology, Faculty of Agriculture, Graduate School, Kyushu University, Fukuoka, Japan, **4** Department of Functional Bioscience, Section of Infection Biology, Fukuoka Dental College, Fukuoka, Japan

## Abstract

*Staphylococcus aureus* uses two-component systems (TCSs) to adapt to stressful environmental conditions. To colonize a host, *S. aureus* must resist bacteriocins produced by commensal bacteria. In a comprehensive analysis using individual TCS inactivation mutants, the inactivation of two TCSs, *graRS* and *braRS*, significantly increased the susceptibility to the class I bacteriocins, nukacin ISK-1 and nisin A, and inactivation of *vraSR* slightly increased the susceptibility to nukacin ISK-1. In addition, two ABC transporters (BraAB and VraDE) regulated by BraRS and one transporter (VraFG) regulated by GraRS were associated with resistance to nukacin ISK-1 and nisin A. We investigated the role of these three TCSs of *S. aureus* in co-culture with *S. warneri*, which produces nukacin ISK-1, and *Lactococcus lactis*, which produces nisin A. When co-cultured with *S. warneri* or *L. lactis*, the *braRS* mutant showed a significant decrease in its population compared with the wild-type, whereas the *graRS* and *vraSR* mutants showed slight decreases. Expression of *vraDE* was elevated significantly in *S. aureus* co-cultured with nisin A/nukacin ISK-1-producing strains. These results suggest that three distinct TCSs are involved in the resistance to nisin A and nukacin ISK-1. Additionally, *braRS* and its related transporters played a central role in *S. aureus* survival in co-culture with the strains producing nisin A and nukacin ISK-1.

**Citation:** Kawada-Matsuo M, Yoshida Y, Zendo T, Nagao J, Oogai Y, et al. (2013) Three Distinct Two-Component Systems Are Involved in Resistance to the Class I Bacteriocins, Nukacin ISK-1 and Nisin A, in *Staphylococcus aureus*. PLoS ONE 8(7): e69455. doi:10.1371/journal.pone.0069455

**Editor:** Michael Otto, National Institutes of Health, United States of America

**Received:** December 6, 2012; **Accepted:** June 10, 2013; **Published:** July 22, 2013

**Copyright:** © 2013 Kawada-Matsuo et al. This is an open-access article distributed under the terms of the Creative Commons Attribution License, which permits unrestricted use, distribution, and reproduction in any medium, provided the original author and source are credited.

**Funding:** This study was supported in part by Grants-in-Aid for Young Scientists (B) from the Ministry of Education, Culture, Sports, Sciences, and Technology of Japan. The funders had no role in study design, data collection and analysis, decision to publish, or preparation of the manuscript.

**Competing Interests:** The authors have declared that no competing interests exist.

\* E-mail: hkomatsu@dent.kagoshima-u.ac.jp

† These authors contributed equally to this work.

## Introduction

Many bacteria produce antibacterial agents, called bacteriocins, which interfere with other bacteria in the bacterial community [1]. Bacteriocins are peptides or proteins that are ribosomally synthesized and show antimicrobial activity, mostly against bacterial species that are closely related to the producers [2]. In gram-positive bacteria, bacteriocins are classified into two major types, classes I and II bacteriocins [3,4,5]. Class I bacteriocins (<5-kDa peptides) are called lantibiotics because they contain the unusual amino acids, lantionine and methyllanthionine, which are posttranslationally modified, whereas class II bacteriocins contain unmodified amino acids. Lantibiotics are further divided into two types (types A and B) [6]. Type A lantibiotics include two subtypes, type A(I) such as nisin A and type A(II) such as nukacin ISK-1. The mode of action of lantibiotics, especially nisin A, has been well characterized [7,8]. Nisin A exhibits pore-forming activity and the inhibition of cell wall biosynthesis. The docking molecule of nisin A is lipid II, which is a membrane component consisting of one GlcNAc–MurNAc pentapeptide subunit linked to a polyisoprenoid and is associated with peptidoglycan biosynthesis in the

membrane [9]. Nukacin ISK-1 also binds to lipid II [10]. However, the mode of action of nukacin ISK-1 is not pore-forming, but the inhibition of cell wall synthesis causes a bacteriostatic effect [10,11]. These bacteriocins are considered to affect other bacterial populations. In addition, some bacteriocins, such as nisin A, are used as preservatives for foods and other surfaces [1].

*Staphylococcus aureus* is a major pathogen in humans that can cause a variety of suppurative diseases, food poisoning, and toxic shock syndrome [12,13,14]. Furthermore, clinically isolated strains, particularly methicillin-resistant *S. aureus* (MRSA), exhibit multiple antibiotic resistances [15,16], resulting in serious problems with regard to therapy against *S. aureus* infectious diseases. Several two-component systems (TCSs) such as *vraSR*, *agrCA*, and *graRS/apsRS*, were recently reported as being associated with susceptibility to antibacterial agents [17,18,19,20]. A TCS, which is thought to function as a monitor and adapt to specific environmental conditions [21], is a prokaryote-specific signal transduction system that contains a sensor that encodes a sensory histidine-kinase and a regulator that encodes a cognate response regulator (RR) [22]. Recently, we and others identified one TCS,

**Table 1.** Bacterial strains.

| Strain                       | Inactivated Gene ID <sup>1</sup> | Gene Name          | Characteristics                                                                                                                     | Reference  |
|------------------------------|----------------------------------|--------------------|-------------------------------------------------------------------------------------------------------------------------------------|------------|
| <i>Staphylococcus aureus</i> |                                  |                    |                                                                                                                                     |            |
| MW2                          | –                                | –                  | Clinical strain, methicillin-resistant ( <i>mecA+</i> ) <i>S. aureus</i>                                                            | 18         |
| MM30                         | –                                | –                  | MW2 harboring pCL8, CP <sup>2</sup>                                                                                                 | This study |
| FK61                         | MW0198-99                        | unassigned         | MW0199:: pCL52.1 in MW2, TC <sup>3</sup>                                                                                            | 18         |
| FK62                         | MW0236-37                        | <i>lytSR</i>       | <i>lytS</i> :: pCL52.1 in MW2, TC <sup>3</sup>                                                                                      | 18         |
| FK64                         | MW0621-22                        | <i>graRS/apsRS</i> | <i>graR</i> :: pCL52.1 in MW2, TC <sup>3</sup>                                                                                      | 18         |
| FK65                         | MW0667-68                        | <i>saeRS</i>       | <i>saeR</i> :: pCL52.1 in MW2, TC <sup>3</sup>                                                                                      | 18         |
| FK66                         | MW1208-09                        | unassigned         | MW1208:: pCL52.1 in MW2, TC <sup>3</sup>                                                                                            | 18         |
| FK67                         | MW1304-05                        | <i>arlRS</i>       | <i>arlR</i> :: pCL52.1 in MW2, TC <sup>3</sup>                                                                                      | 18         |
| FK68                         | MW1445-46                        | <i>srrAB</i>       | <i>srrA</i> :: pCL52.1 in MW2, TC <sup>3</sup>                                                                                      | 18         |
| FK69                         | MW1636-37                        | <i>phoPQ</i>       | <i>phoP</i> :: pCL52.1 in MW2, TC <sup>3</sup>                                                                                      | 18         |
| FK71                         | MW1789-90                        | unassigned         | MW1790:: pCL52.1 in MW2, TC <sup>3</sup>                                                                                            | 18         |
| FK72                         | MW1824-25                        | <i>vraSR</i>       | <i>vraS</i> :: pCL52.1 in MW2, TC <sup>3</sup>                                                                                      | 18         |
| FK73                         | MW1962-63                        | <i>agrCA</i>       | <i>agrC</i> :: pCL52.1 in MW2, TC <sup>3</sup>                                                                                      | 18         |
| FK74                         | MW2002-03                        | <i>kdpDE</i>       | <i>kdpD</i> :: pCL52.1 in MW2, TC <sup>3</sup>                                                                                      | 18         |
| FK75                         | MW2282-83                        | <i>hssRS</i>       | <i>hssR</i> :: pCL52.1 in MW2, TC <sup>3</sup>                                                                                      | 18         |
| FK76                         | MW2313-14                        | <i>nreBC</i>       | <i>nreB</i> :: pCL52.1 in MW2, TC <sup>3</sup>                                                                                      | 18         |
| FK77                         | MW2544-45                        | <i>braRS</i>       | <i>braR</i> :: pCL52.1 in MW2, TC <sup>3</sup>                                                                                      | 18         |
| MM08                         | MW2544                           | <i>braS</i>        | <i>braS</i> :: pCL52.1 in MW2, TC <sup>3</sup>                                                                                      | 23         |
| MM09                         | MW2544                           | <i>braS</i>        | pMM09( <i>braS</i> ) in MM08, TC <sup>3</sup> , CP <sup>4</sup>                                                                     | 23         |
| MM01                         | MW0623-24                        | <i>vraFG</i>       | <i>vraF</i> :: pCL52.1 in MW2, TC <sup>3</sup>                                                                                      | This study |
| MM17                         | MW0623-24                        | <i>vraFG</i>       | pMM17( <i>vraFG</i> ) in MM01, TC <sup>3</sup> , CP <sup>4</sup>                                                                    | This study |
| MM02                         | MW2543-42                        | <i>braAB</i>       | <i>braA</i> :: pCL52.1 in MW2, TC <sup>3</sup>                                                                                      | 23         |
| MM07                         | MW2542                           | <i>braB</i>        | <i>braB</i> :: pCL52.1 in MW2, TC <sup>3</sup>                                                                                      | 23         |
| MM10                         | MW2542                           | <i>braB</i>        | pMM10( <i>braB</i> ) in MM07, TC <sup>3</sup> , CP <sup>4</sup>                                                                     | 23         |
| MM03                         | MW2620-21                        | <i>vraDE</i>       | <i>vraD</i> :: pCL52.1 in MW2, TC <sup>3</sup>                                                                                      | 23         |
| MM11                         | MW2620-21                        | <i>vraDE</i>       | pMM11( <i>vraDE</i> ) in MM03, TC <sup>3</sup> , CP <sup>4</sup>                                                                    | 23         |
| MM12                         | MW0621-21                        | <i>graRS/apsRS</i> | pMM12( <i>graR</i> ) in FK64, TC <sup>3</sup> , CP <sup>4</sup>                                                                     | This study |
| MM31                         | MW0621-22                        | <i>graRS/apsRS</i> | pMM11( <i>vraDE</i> ) in FK64, TC <sup>3</sup> , CP <sup>4</sup>                                                                    | This study |
| MM231                        | MW1824-25                        | <i>vraSR</i>       | pMM231( <i>vraSR</i> ) in FK72, TC <sup>3</sup> , CP <sup>4</sup>                                                                   | This study |
| <i>Escherichia coli</i>      |                                  |                    |                                                                                                                                     |            |
| XL-II                        | –                                | –                  | <i>endA1 supE44 thi-1 hsdR17 recA1 gyrA96 relA1 lac</i> [F' <i>proAB lacIqZΔM15 Tn10</i> (Tet <sup>r</sup> ) Amy Cam <sup>r</sup> ] | Stratagene |
| mm01                         | MW0623-24                        | <i>vraFG</i>       | pMM01/ <i>E. coli</i> XL-II for <i>vraF</i> inactivation, Amp <sup>r4</sup>                                                         |            |
| mm17                         | MW0623-24                        | <i>vraFG</i>       | pMM17/ <i>E. coli</i> XL-II for <i>vraFG</i> complementation, Amp <sup>r</sup>                                                      | This study |
| mm12                         | MW0621-21                        | <i>graRS/apsRS</i> | pMM12/ <i>E. coli</i> XL-II for <i>graR</i> complementation, Amp <sup>r</sup>                                                       | This study |
| mm31                         | MW0621-22                        | <i>vraDE</i>       | pMM31/ <i>E. coli</i> XL-II for <i>vraDE</i> complementation, Amp <sup>r</sup>                                                      | This study |
| mm231                        | MW1824-25                        | <i>vraSR</i>       | pMM231/ <i>E. coli</i> XL-II for <i>vraSR</i> complementation, Amp <sup>r</sup>                                                     | This study |

<sup>1</sup>Gene ID in *S. aureus* MW2.<sup>2</sup>Chloramphenicol resistance.<sup>3</sup>Tetracycline resistance.<sup>4</sup>Ampicillin resistance.

doi:10.1371/journal.pone.0069455.t001

called BceRS [23], BraRS [24] or NsaRS [25], which affects susceptibility to bacitracin. In addition, this TCS is associated with resistance to nisin A [24,25,26]. Because this TCS was designated separately by three different groups, we used the name BraRS in this study because Hiron *et al* well characterized this TCS and the name (bacitracin resistance associated) is representative of its characteristics [24]. These findings suggest that *S. aureus* has several systems for resisting bacteriocins. Given that *S. aureus* is a

commensal bacterium in the nasal cavity, skin, and intestine, this organism is faced with many other bacterial species, including other staphylococci such as *S. epidermidis* and *S. warneri* [27,28]; thus it is considered that *S. aureus* must resist bacteriocins to survive when it co-exists with bacteriocin-producing bacteria. Herein, we investigated the association of TCSs with susceptibility to the class I bacteriocin, nukacin ISK-1.

## Materials and Methods

### Bacterial Strains and Growth Conditions

The bacterial strains used in this study are listed in Tables 1 and 2. *S. aureus* inactivation mutants were constructed previously [23]. *S. aureus* and *S. warneri* were grown in trypticase soy broth (TSB; Becton Dickinson Microbiology Systems, Cockeysville, MD, USA) at 37°C. *Escherichia coli* XL-II was grown in Luria-Bertani (LB) broth at 37°C. *Lactococcus lactis* was grown in De Man, Rogosa, Sharpe (MRS) broth (Becton Dickinson Microbiology Systems) at 37°C. Tetracycline (TC; 5 µg/ml) or chloramphenicol (CP; 10 µg/ml) was added to *S. aureus* when necessary.

### Evaluation of Bacteriocin Susceptibility

Two methods (the minimum inhibitory concentration [MIC] and direct methods) were used to evaluate susceptibility to bacteriocins. MICs of nisin A, nukacin ISK-1, and bacitracin were determined by micro-dilution method as described previously [29]. Nisin A [30] and nukacin ISK-1 [31] were purified as described elsewhere. MICs were determined after 10 h of incubation. Three independent experiments were performed.

In the direct method, modified from a previous method [32], 2 µl of an overnight culture of *S. warneri* and *L. lactis* were spotted on an MRS agar plate. After overnight incubation at 37°C, 5 ml of pre-warmed TSB soft agar (0.75%) containing wild-type *S. aureus* or the mutants at 10<sup>6</sup> cells/ml was poured over the TSB agar plate. Plates were incubated for 20 h at 37°C. We confirmed that the diameter of the producing colony was uniformly 7 mm among all strains. The diameter of the inhibition zones surrounding bacteriocin-producing strains was measured in three directions. Three independent experiments were performed for the direct method, and the average result of the three experiments was calculated. Statistical analysis was performed with Dunnett's method.

### Effect of Nukacin ISK-1 and Nisin A on the Expression of TCSs and Transporters

A small portion (10<sup>8</sup> cells) of *S. aureus* cultured overnight was inoculated into 10 ml fresh TSB, and then grown at 37°C with shaking. When the optical density reached 0.5 at 660 nm, various concentrations of nukacin ISK-1 or nisin A were added to the medium. After the appropriate incubation, bacterial cells were collected. Total RNA was extracted from the bacterial cells with a FastRNA Pro Blue kit (MP Biomedicals, Solon, OH, USA) in accordance with the manufacturer's protocol. A 1-µg aliquot of total RNA was reverse-transcribed to cDNA using a first-strand cDNA synthesis kit (Roche, Tokyo, Japan). Using cDNA as template, quantitative PCR was performed using a LightCycler system (Roche). Primers for *braR*, *vraR*, and *graR* (TCS), as well as for *braA*, *vraD*, and *vraF* (ABC transporter) were constructed and used to determine the optimal conditions for analysis of their expression, and *gyrA* was used as an internal control. Three

**Table 3.** Susceptibility to nisin A, nukacin ISK-1 and bacitracin of *S. aureus* mutants.

| Strain | Relevant Genotype                         | MIC (mg/L) |               |            |
|--------|-------------------------------------------|------------|---------------|------------|
|        |                                           | Nisin A    | Nukacin ISK-1 | Bacitracin |
| MW2    | Wild-type                                 | 6.4        | 64            | 64         |
| FK77   | $\Delta braRS$                            | 3.2        | 16            | 32         |
| MM08   | $\Delta braS$                             | 3.2        | 16            | 32         |
| MM09   | <i>braS</i> complement in $\Delta braS$   | 6.4        | 64            | 64         |
| FK64   | $\Delta graRS$                            | 3.2        | 16            | 64         |
| MM12   | <i>graR</i> complement in $\Delta graRS$  | 6.4        | 64            | 64         |
| FK72   | $\Delta vraSR$                            | 6.4        | 32            | 32         |
| MM231  | <i>vraSR</i> complement in $\Delta vraSR$ | 6.4        | 64            | 64         |
| MM02   | $\Delta braAB$                            | 3.2        | 16            | 32         |
| MM07   | $\Delta braB$                             | 3.2        | 16            | 32         |
| MM10   | <i>braB</i> complement in $\Delta braB$   | 6.4        | 64            | 64         |
| MM03   | $\Delta vraDE$                            | 3.2        | 8             | 16         |
| MM11   | <i>vraDE</i> complement in $\Delta vraDE$ | 6.4        | 64            | 64         |
| MM01   | $\Delta vraFG$                            | 3.2        | 32            | 64         |
| MM17   | <i>vraFG</i> complement in $\Delta vraFG$ | 6.4        | 64            | 64         |

doi:10.1371/journal.pone.0069455.t003

independent experiments were performed, and the mean was calculated. Statistical analysis was performed with Dunnett's method. The primers are listed in Table S1.

### Co-culture of *S. aureus* with *S. warneri* or *L. lactis*

The method for the co-culture experiment is summarized schematically in Figure S1. Overnight cultures of *S. aureus* MM30 (MW2 harboring pCL8 [33]), *S. warneri* ISK-1, *S. warneri* ISK-1<sup>-</sup>, *L. lactis* ATCC 11454, and *L. lactis* NZ9000 were adjusted to OD<sub>660</sub> = 1.0 and diluted ten-fold. Next, 100 µl of bacterial culture (*S. aureus* [10<sup>7</sup>, 10<sup>6</sup>, 10<sup>5</sup>, 10<sup>4</sup> cells] and *S. warneri* [10<sup>7</sup> cells], *S. aureus* [10<sup>7</sup>, 10<sup>6</sup>, 10<sup>5</sup>, 10<sup>4</sup> cells], and *L. lactis* [10<sup>7</sup> cells]) was mixed well. A 20-µl aliquot of the mixed culture was spotted on a 50% trypticase soy agar (TSA) plates. After overnight incubation at 37°C, the bacterial colonies growing on the agar plate were scraped and suspended in 1 ml of TSB. The appropriate dilutions were plated on TSA and TSA containing chloramphenicol (for selection of *S. aureus*). After 1 day, the colony-forming units (CFUs) grown on TSA and TSA containing antibiotics were determined, and we calculated the percent population of the *S. aureus* strain. We also extracted total RNA from scraped cells and performed cDNA synthesis using the method described above; gene expression analysis was conducted by quantitative PCR. The statistical

**Table 2.** Bacteriocin-producing and non-producing strains used in this study.

| Strain                                           | Bacteriocin                                     | Reference |
|--------------------------------------------------|-------------------------------------------------|-----------|
| <i>Lactococcus lactis</i> ATCC 11454             | Nisin A (class I)                               | 50        |
| <i>Lactococcus lactis</i> NZ9000                 | Nisin A non-producing                           | 10        |
| <i>Staphylococcus warneri</i> ISK-1              | Nukacin ISK-1 (class I)                         | 31        |
| <i>Staphylococcus warneri</i> ISK-1 <sup>-</sup> | pPI-1 cured strain, nukacin ISK-1 non-producing | 51        |

doi:10.1371/journal.pone.0069455.t002

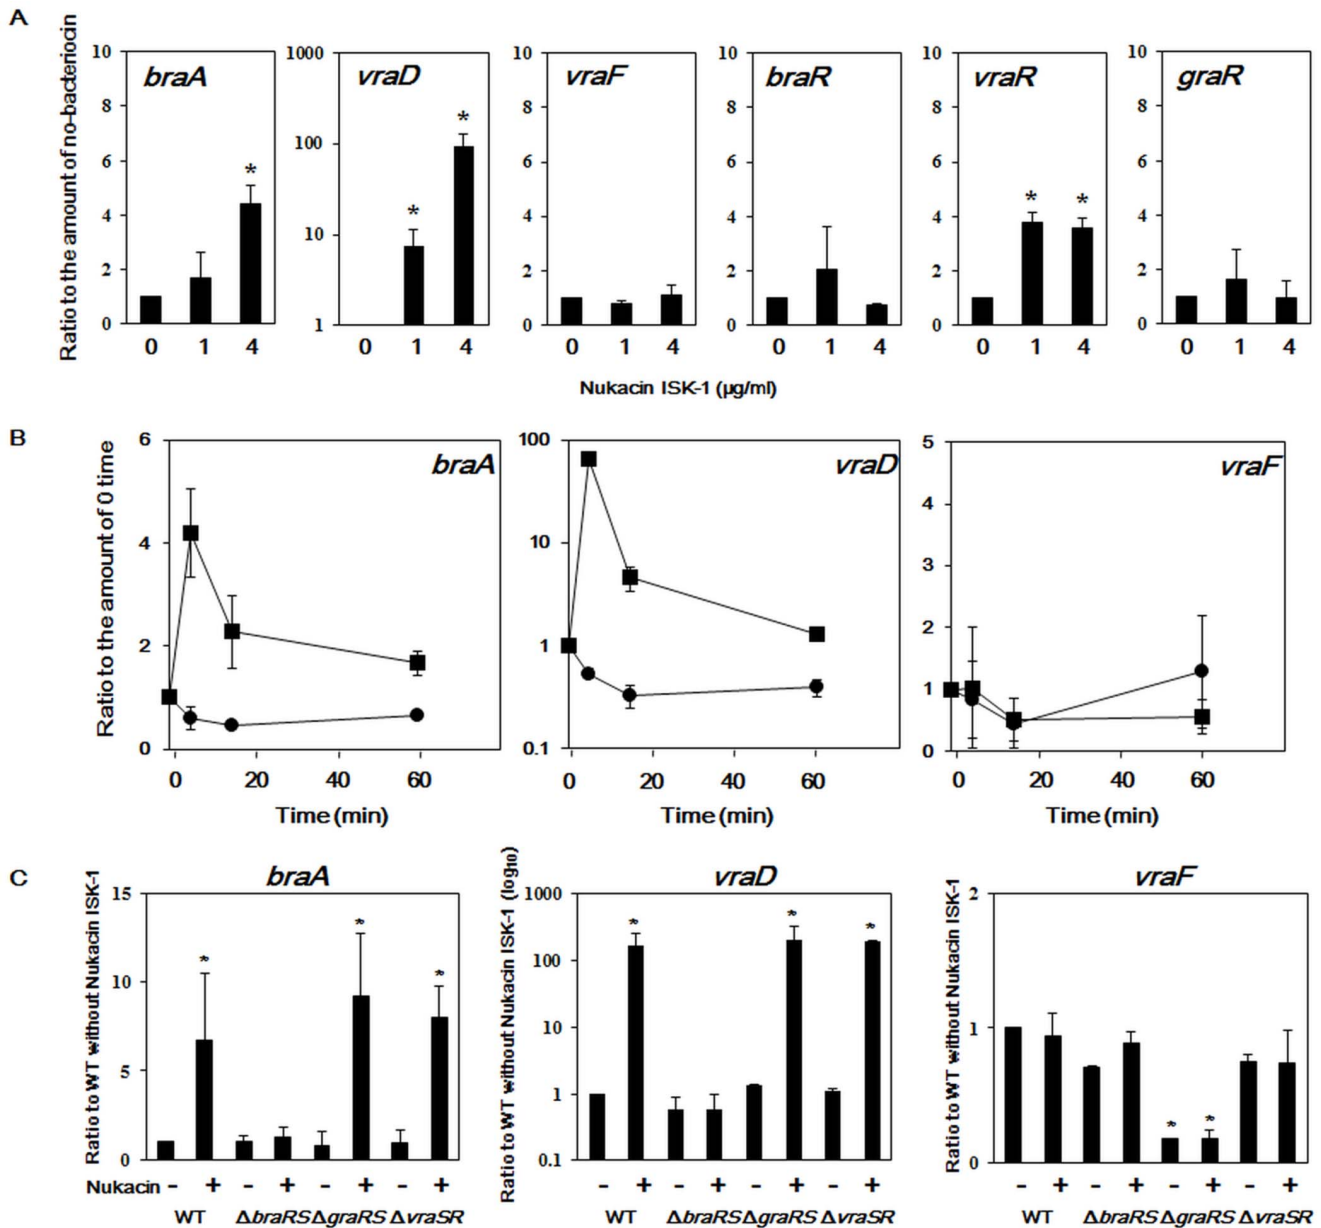

**Figure 1. Expression of TCSs and ABC transporters in *S. aureus* exposed to nukacin ISK-1.** Analysis of expression levels of *braR*, *graR*, *vraR*, *braA*, *vraD*, and *vraF* were performed as described in the Materials and Methods. (A) *braA*, *vraF*, *vraD*, *braR*, *graR*, and *vraR* expression in *S. aureus* MW2 exposed to various concentrations of nukacin ISK-1 (5-min exposure). \*, statistically significant difference from the wild-type as tested using Dunnett's method ( $p < 0.05$ ). (B) Time course experiment of *braA*, *vraF*, and *vraD* expression in *S. aureus* MW2 exposed to nukacin ISK-1 (4 µg/ml). (C) *braA*, *vraF*, and *vraD* expression in *S. aureus* MW2 and three mutants (*braRS*, *graRS*, and *vraSR* mutant) exposed to nukacin ISK-1 (4 µg/ml). \*, statistically significant difference from the wild-type as tested using Dunnett's method ( $p < 0.05$ ). doi:10.1371/journal.pone.0069455.g001

analysis was conducted by Dunnett's method for the percentage ratio of the *S. aureus* population and the expression of *braA* and *vraD*.

Next, the co-culture of *S. aureus* TCS or ABC transporter mutants with *S. warneri* or *L. lactis* was investigated using the method described above. The concentrations of bacterial cells used in this assay were  $10^7$  cells/ml *S. aureus* mutant and  $10^8$  cells/ml *S. warneri* or  $10^6$  cells/ml *S. aureus* mutant and  $10^8$  cells/ml *L. lactis*. For the co-culture of *S. aureus* with *S. warneri*, TSA containing chloramphenicol (wild-type *S. aureus*, 10 µg/ml) and tetracycline (*S. aureus* mutants, 10 µg/ml) were used for *S. aureus* selection.

### Susceptibility of Bacitracin-treated *S. aureus* to Nukacin ISK-1 and Nisin A

To investigate whether the *VraDE* expression level affects susceptibility to nisin A and nukacin ISK-1, we evaluated the susceptibility of bacitracin-pretreated *S. aureus* to nisin A and nukacin ISK-1 using the MIC method, as described above, and the spot-on-lawn method described elsewhere [11]. Previously, we reported that bacitracin at a sub-MIC induced *VraDE* expression significantly [23]. *S. aureus* pretreated with or without bacitracin was used for both methods. *S. aureus* cells ( $10^9$ /ml) were exposed to a sub-MIC (1/8 MIC: 8 µg/ml) of bacitracin (Sigma-Aldrich,

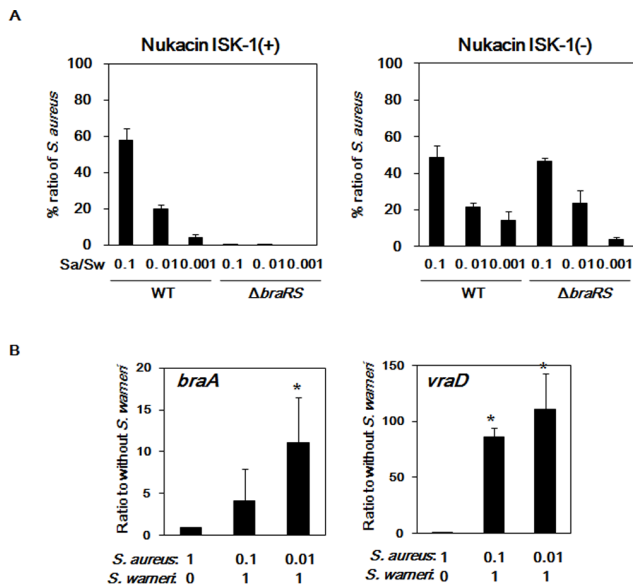

**Figure 2. Co-culture of *S. aureus* with *S. warneri*.** The co-culture experiment was performed with the method described in the Materials and Methods. (A) Percent ratio of the *S. aureus* population when mixed with various concentrations of *S. warneri* ISK-1 and nukacin-non-producing *S. warneri*. (B) Expression of the ABC transporters (*braA* and *vraD*) when mixed with various concentrations of *S. warneri* ISK-1. \* $p < 0.05$ , as determined by Dunnett's method for the expression of the ABC transporters (*braA* and *vraD*). doi:10.1371/journal.pone.0069455.g002

Tokyo, Japan) for 30 min. In the spot-on-lawn method, 5  $\mu$ l of nisin A (6.4  $\mu$ g/ml) or nukacin ISK-1 (64  $\mu$ g/ml) were spotted on a double-layered agar plate containing 8 ml of TSA soft agar with  $10^6$ /ml *S. aureus* cells as the upper layer and 10 ml of TSB agar (1.5%) as the bottom layer. After overnight incubation at 37°C, the diameter of the inhibition zone for bacterial growth was measured in three directions.

Additionally, we constructed the *VraDE* overexpression strain in the *graRS* mutant and investigated the susceptibility to nisin A and nukacin ISK-1. The gene coding *vraDE* was amplified with specific primers, and then the DNA fragment was cloned into pCL15, which harbored an *E. coli*-*S. aureus* shuttle vector with the *P<sub>spac</sub>* promoter [34]. The expression of the cloned gene in pCL15 was significantly induced by the addition of 1 mM isopropyl  $\beta$ -D-1-thiogalactopyranoside (IPTG). The obtained plasmid was electroporated to *S. aureus* RN4220, and then the plasmid was transduced to the *gra* mutant using phage 80 alpha with the method described in a previous study [35]. Plasmids and primers used in the present study are listed in Table S1. Using this strain, susceptibility was investigated by the MIC method and the spot-on-lawn method, as described above.

## Results

### Susceptibility of TCS-inactivated Mutants to nisin A and Nukacin ISK-1

We determined the susceptibility of TCS mutants to nukacin ISK-1 using the MIC and the direct method (Table 3, Figure S2). The *graRS* and *braRS* mutants exhibited higher susceptibility to nukacin ISK-1, and the *vraSR* mutant exhibited higher susceptibility to nukacin ISK-1. The susceptibilities of other TCS mutants other than *braRS*, *graRS* and *vraSR* to nukacin ISK-1 did not change (data not shown). We also evaluated the susceptibility

of TCS mutants to nisin A and nukacin ISK-1 using the direct method (Figure S2), and obtained similar results to those obtained using the MIC method. Furthermore, we determined the susceptibility of the mutants and their complemented strains. We found that each complemented strain could restore the respective mutation (Table 3). Also, we investigated the susceptibility of TCS mutants against nisin A, and found similar results to nukacin ISK-1 except that the susceptibility of the *vraRS* mutant to nisin A did not increase (Table 3, Figure S2).

### Susceptibility of ABC Transporter-inactivated Mutants to nisin A and nukacin ISK-1

Previously, we demonstrated that *BraRS* regulates two transporters (*VraDE* and *BraAB*) for resistance against bacitracin, and that *GraRS* regulates one transporter (*VraFG*) [19,23]. We evaluated the susceptibility of these three mutants (*vraDE*, *braAB*, and *vraFG* mutants) to nukacin-ISK-1 (Table 3, Figure S2). The *vraFG*, *vraDE*, and *braAB* mutants were more susceptible to nukacin ISK-1. Additionally, we found that each complemented strain could restore the respective mutation (Table 3). Also, we investigated the susceptibilities of these mutants to nisin A, and obtained similar results to those for nukacin ISK-1 (Table 3, Figure S2).

### Effect of Nukacin ISK-1 and Nisin A on the Expression of TCSs and Transporters

Given that the susceptibility to nisin A and nukacin ISK-1 was changed by inactivation of three TCSs (*braRS*, *graRS*, and *vraSR*) and three transporters (*vraFG*, *vraDE*, and *braAB*), we investigated the expressions of those TCSs and transporters upon exposure of bacterial cells to nukacin ISK-1 and nisin A.

Among the three TCSs, the expression levels of the *braR* and *graR* transcripts did not increase upon exposure to nukacin ISK-1, whereas the expression of *vraR* was induced (Figure 1A). Regarding the three ABC transporters, the expression of *braA* and *vraD* in the wild-type MW2 strain was rapidly induced by the addition of nukacin ISK-1 to the medium, whereas *vraF* expression was not (Figures 1A and 1B). This induction occurred after 5 min of exposure, after which the transcript levels of both transporters gradually decreased (Figure 1B). The expressions of both *braA* and *vraD* were dose-dependent (Figure 1A). However, the induction of *vraD* and *braA* expression by nukacin ISK-1 was not observed in the *braRS* mutant, although both genes showed increased expression in the *graRS* and *vraSR* mutants (Figure 1C). In the *graRS* mutant, *vraF* expression decreased irrespective of nukacin ISK-1 addition, but in the other two mutants, the *vraF* expression level was not significantly different from that of the wild-type (Figure 1C).

In addition, we investigated the expression of TCSs and transporters in the wild-type and its mutants by addition of nisin A. We obtained results similar to those of nukacin ISK-1, except that nisin A did not induce *vraSR* expression (Figure S3).

Based on these results, we concluded that the expression of two ABC transporters, *vraD* and *braA*, was induced by nukacin ISK-1 and nisin A, and that this effect was mediated by one TCS, *BraRS*. Also, the expression of another transporter, *vraF*, was not induced, but *vraF* expression was regulated by *GraRS*.

### Co-culture of *S. aureus* with *S. warneri* or *L. lactis*

Co-cultures of *S. aureus* MM30 with *S. warneri* ISK-1, *S. warneri* ISK-1 $\Delta$ pPI-1 (pPI-1 plasmid cured), *L. lactis* ATCC 11454 (nisin A-producing strain), and *L. lactis* NZ9000 (nisin A non-producing strain) were analyzed. When *S. aureus* MM30 was co-cultured with

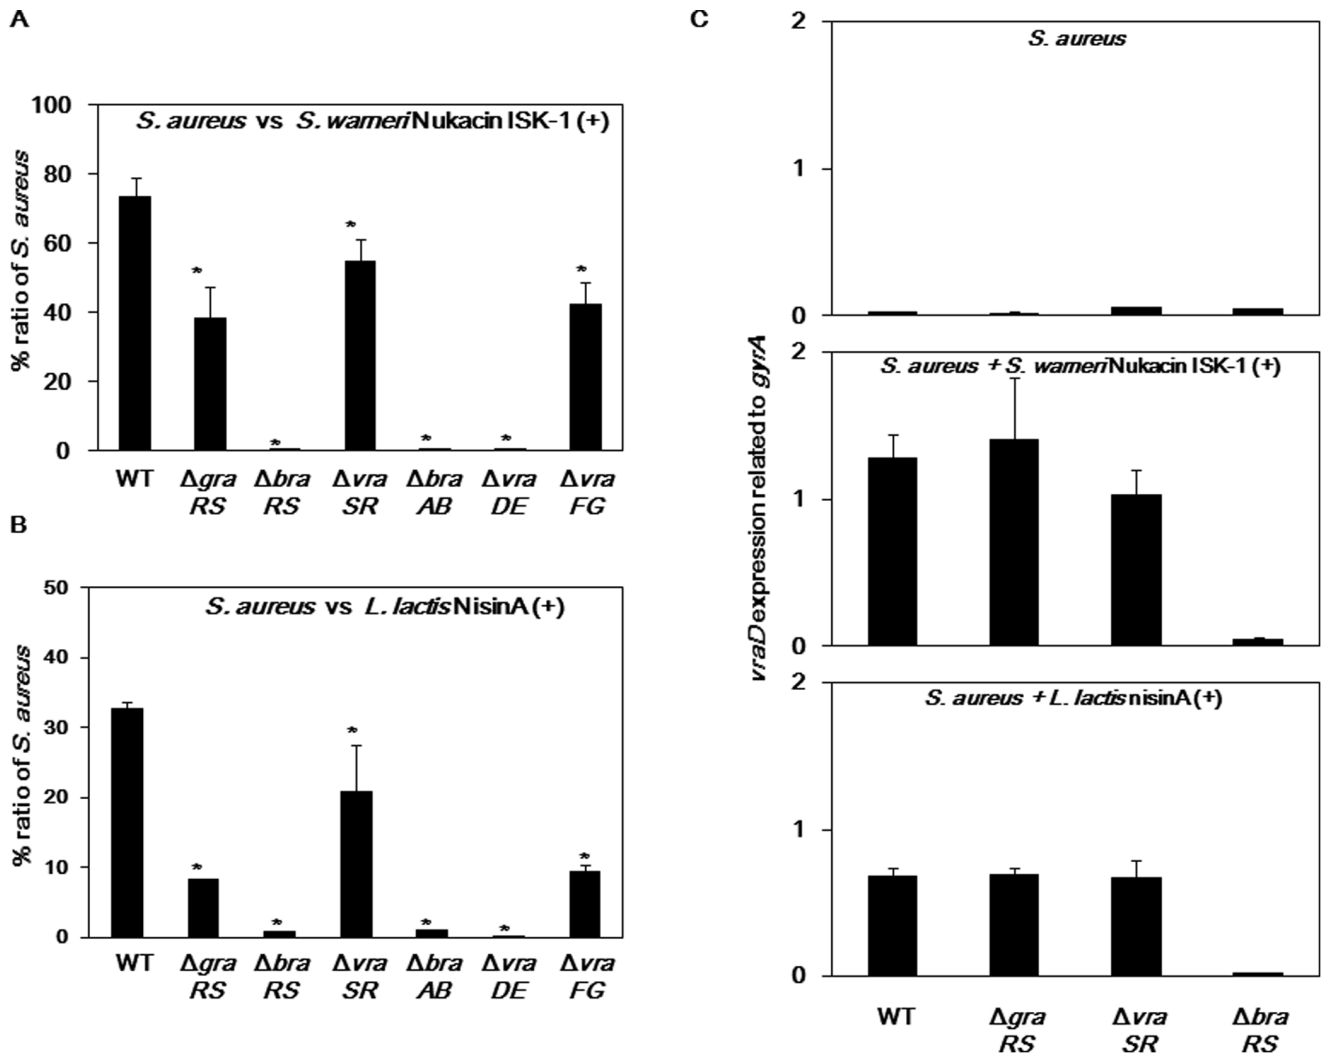

**Figure 3. Co-culture of *S. aureus* TCS and transporter mutants with *S. warneri* or *L. lactis*.** The co-culture assay is described in the Materials and Methods. A 100- $\mu$ l aliquot of *S. warneri* ISK-1 ( $10^8$  cells/ml) (A) or *L. lactis* ATCC 11454 ( $10^8$  cells/ml) (B) was mixed with 100  $\mu$ l of *S. aureus* ( $10^7$  cells/ml for *S. warneri* and  $10^6$  cells/ml for *L. lactis*). (C) Expression of the ABC transporter *vraDE* in the mutants when mixed with *S. warneri* ISK-1 or *L. lactis*. \* $p < 0.05$ , as determined by Dunnett's method for the percent ratio of the *S. aureus* population and the expression of the ABC transporters. doi:10.1371/journal.pone.0069455.g003

*S. warneri* ISK-1, which produces nukacin ISK-1, the population of the *braRS* mutant was significantly lower at any *S. aureus*/*S. warneri* ratio, compared to that of the wild-type (MM30) (Figure 2A). When *S. aureus* was co-cultured with *S. warneri* ISK-1 $\Delta$ pPI-1, which does not produce nukacin ISK-1, the population of the *braRS* mutant was similar to that of the wild-type. We evaluated the expression of *vraD* and *braA* under co-culture conditions (Figure 2B). The expression of both increased when *S. aureus* was co-cultured with *S. warneri* ISK-1 at various ratios. In particular, both increased gradually as the ratio of *S. aureus* to *S. warneri* decreased before spotting on the TSA plate.

*S. aureus* MM30 was co-cultured with *L. lactis* ATCC 11454, which produces nisin A, or NZ9000, which does not. Results were similar to those of nukacin ISK-1 (Figure S4).

Figure 3A shows the *S. aureus* population ratio when  $10^6$  cells of *S. aureus* mutants were mixed with  $10^7$  *S. warneri* ISK-1 cells. The *braRS*, *braAB*, and *vraDE* mutants exhibited drastically decreased population ratios compared with that of the wild-type. In addition,

the *graRS*, *vraSR*, and *vraFG* mutants showed slight decreases compared with the wild-type.

Similar results were obtained when  $10^5$  cells of *S. aureus* mutants were mixed with  $10^7$  *L. lactis* cells (Figure 3B). When co-cultured with the ATCC 11454 strain, the population ratios of the *braRS*, *braAB*, and *vraDE* mutants were significantly lowered, compared to that of the wild-type. Additionally, we investigated *vraD* expression in TCS mutants. The wild-type, *graRS* and *vraSR* mutants showed significantly increased *vraD* expression upon co-culture with bacteriocin-producing strains (Figure 3C). However, *vraD* expression did not increase in the wild-type, *graRS* and *vraSR* mutants when co-cultured with bacteriocin-non-producing strains (data not shown).

From the results of co-culture assay, we found that the inactivation of one TCS (*braRS*) and two BraRS-regulated transporters (*braAB* and *vraDE*) caused a significant decrease in the *S. aureus* population when co-cultured with a nukacin ISK-1- or nisin A-producing strain.

**Table 4.** Susceptibility of bacitracin-treated and *vraDE*-overexpressing *S. aureus* to nisin A and nukacin ISK-1.

| Strain | Relevant Genotype            | MIC (mg/L)     |               |                |               |
|--------|------------------------------|----------------|---------------|----------------|---------------|
|        |                              | Bacitracin (-) |               | Bacitracin (+) |               |
|        |                              | Nisin A        | Nukacin ISK-1 | Nisin A        | Nukacin ISK-1 |
| MW2    | Wild-type                    | 6.4            | 64            | 12.8           | 128           |
| FK64   | $\Delta$ <i>apsRS</i> in MW2 | 3.2            | 32            | 12.8           | 128           |
| FK72   | $\Delta$ <i>vraSR</i> in MW2 | 6.4            | 32            | 12.8           | 128           |
| FK77   | $\Delta$ <i>braRS</i> in MW2 | 3.2            | 16            | 3.2            | 16            |

  

| Strain | Relevant Genotype    | IPTG (-) |               |          |               |
|--------|----------------------|----------|---------------|----------|---------------|
|        |                      | IPTG (-) |               | IPTG (+) |               |
|        |                      | Nisin A  | Nukacin ISK-1 | Nisin A  | Nukacin ISK-1 |
| MM31   | <i>vraDE</i> in FK64 | 3.2      | 32            | 12.8     | 128           |

Expression of *braR*, *graR*, *vraR*, *braA*, *vraD*, and *vraF* was determined using the method described in the Materials and Methods. (A) *braA*, *vraF*, *vraD*, *braR*, *graR*, and *vraR* expression in *S. aureus* MW2 exposed to various concentrations of nisin A (5 min exposure). \*, statistically significant difference from the wild-type as tested using Dunnett's method ( $p < 0.05$ ). (B) Time course experiment of *braA*, *vraF*, and *vraD* expression in *S. aureus* MW2 exposed to nisin A (16  $\mu$ g/ml). (C) *braA*, *vraF*, and *vraD* expression in *S. aureus* MW2 and three mutants (*braRS*, *graRS*, and *vraSR* mutant) exposed to nisin A (16  $\mu$ g/ml). \*, statistically significant difference from the wild-type as tested using Dunnett's method ( $p < 0.05$ ).

doi:10.1371/journal.pone.0069455.t004

### Susceptibility of Bacitracin-treated *S. aureus* to nisin A and nukacin ISK-1

Because *vraDE* expression of the *S. aureus* wild-type was induced by nisinA or nukacin ISK-1, we investigated whether the *VraDE*-overexpressing strain showed higher resistance to nisinA and nukacin ISK-1. We used *S. aureus* pretreated with a sub-MIC of bacitracin, which induced the expression of *VraDE* [23] but was not bactericidal. The wild-type strain pretreated with bacitracin showed an increased nisin A and nukacin ISK-1 MICs compared to that without bacitracin (Table 4). Also, the MICs of the *graRS* and *vraRS* mutants against nisin A and nukacin ISK-1 were increased by pretreatment with bacitracin, whereas the MIC of the *braRS* mutant did not change. In addition, we constructed a *VraDE*-overexpression strain using the pCL15 plasmid. *VraDE*

overexpression in the *graRS* mutant caused decreased susceptibility to both nisin A and nukacin ISK-1 (Table 4).

### Discussion

We performed a comprehensive analysis of the TCSs involved in the susceptibility to the class I bacteriocin, nukacin ISK-1, in *S. aureus* and identified several TCSs to be associated with nukacin ISK-1 susceptibility (Figure S2, Table 3). Previously, *BraRS* and *GraRS* were also shown to be associated with bacitracin and nisin A resistance [23,24,25,36]. In addition, Hiron *et al.* demonstrated that *BraRS* is activated by nisin A, which induces the expression of transporters [24], as confirmed by the results in this study (Figure 1, Figure S3). Therefore, *BraRS* is involved in the resistance to nukacin ISK-1, nisin A and bacitracin. Bacitracin binds to

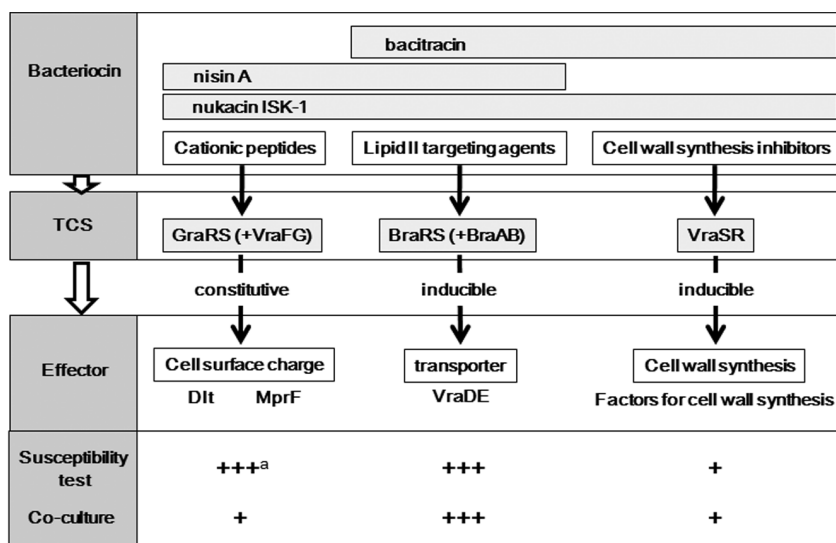

a: +: involved in the resistance, +++:strongly involved

**Figure 4.** Association of TCSs and ABC transporters with susceptibility to class I bacteriocins, nisin A and nukacin ISK-1.

doi:10.1371/journal.pone.0069455.g004

undecaprenyl pyrophosphate, resulting in inhibition of lipid II formation, whereas nisin A and nukacin ISK-1 bind to lipid II [9,10]. Vancomycin also binds to the D-alanine-D-alanine molecule in lipid II; however, the *braRS* mutant did not exhibit marked susceptibility to vancomycin [18]. Nisin A binds to the pyrophosphate moiety of lipid II, resulting in pore formation in the membrane [9]. Therefore, we propose that BraRS is associated with susceptibility to antibacterial agents related to the membrane-anchoring region of lipid II. Recently, BraAB was found to act as a cofactor for BraRS but not as a direct resistance factor, suggesting that it is associated with the regulation of *vraDE* [24]. BraRS in *S. aureus* shows homology with TCSs of other gram-positive bacteria, including *Enterococcus*, *Bacillus* and *Streptococcus* [37,38,39,40]. Therefore, the BraRS system is widely conserved in gram-positive bacteria.

GraRS is involved in susceptibility to cationic peptides such as defensins, gentamicin, and vancomycin [41,42,43] because it regulates two factors, *dlt* and *mprF* (*fntC*), both of which influence the cell surface charge of bacteria [36,42,43,44]. Inactivation of *graRS* causes an increase in the negative charge of the cell surface, resulting in increased attraction of the cationic peptides nisin A and nukacin ISK-1, but not bacitracin, to the cell membrane. In addition, *vraFG* (downstream of *graRS*) is associated with susceptibility to nisin A and nukacin ISK-1, but not bacitracin. Recently, Falord *et al.* demonstrated that *VraFG* did not act as a detoxification module but was associated with GraRS activation [45]. Therefore, the difference in susceptibilities between nisin A/nukacin ISK-1 and bacitracin may be due to the charges of these peptides.

*VraSR* (vancomycin resistance associated sensor/regulator) was first identified as a factor responsible for vancomycin susceptibility [46]. Further investigations revealed that this TCS regulates many factors involved in cell wall biosynthesis and that it is associated with susceptibility to cell wall synthesis inhibitors including beta-lactams, cycloserine, teicoplanin, and bacitracin [47,48,49]. In this study, the inactivation of *vraSR* led to an increase in susceptibility to nukacin ISK-1, but not nisin A (Table 3 and Figure S2). Moreover, nukacin ISK-1 induced *vraSR* expression (Figure 1A), whereas nisin A did not (Figure S3). Although nisin A also exhibits an inhibitory effect on cell wall biosynthesis, we did not detect elevated *vraSR* expression under our conditions. Nukacin ISK-1 and nisin A are type A lantibiotics, but their subtypes (type A [I] and type A [II], respectively) and structure differ (Figure S5). Also, their modes of action differ; nisin A exhibits a bactericidal effect by causing pore formation and the inhibition of cell wall biosynthesis [7,8], whereas nukacin ISK-1 acts as a bacteriostatic agent by inhibiting cell wall biosynthesis [11]. Therefore, we hypothesize that the different modes of action of these two bacteriocins reflect the different responses in terms of *vraSR* expression.

We evaluated the competition between two bacterial strains using a co-culture method. Notably, the inactivation of three TCSs, but especially *graRS* and *braRS*, caused significantly increased susceptibility to nisin A and nukacin ISK-1 by the direct and the MIC methods (Figure S2 and Table 3); however, only one TCS, BraRS, was a major contributor to *S. aureus* survival in co-culture with *S. warneri* or *L. lactis*, which produces bacteriocin (Figures 2, 3 and S4). In particular, the *graRS* mutant showed different results between the direct and co-culture methods. We hypothesized that this difference in the *graRS* mutant was due to the different level of *VraDE* expression upon exposure of the mutant to nisin A and nukacin ISK-1. In the direct assay, *S. aureus* cells that expressed *VraDE* at a very low level were exposed to relatively high concentrations of nisin A and nukacin ISK-1. In the early period after bacteriocin exposure, *VraDE* expression was not

sufficient for BraRS-mediated nisin A/nukacin ISK-1 resistance; thus the *graRS* mutation, which exhibited a more negatively charged cell surface [42,43], showed marked susceptibility to nisin A and nukacin ISK-1. Conversely, *S. aureus* cells in the co-culture are exposed to a low concentrations (non-lethal) of nisin A or nukacin ISK-1 during the early stage of co-culture, and so *VraDE* expression is induced. Upon exposure to a high concentration of nisin A or nukacin ISK-1 during further incubation, *S. aureus* expressed *VraDE* at a level sufficient for resistance. Table 4 reflects our hypothesis that pretreatment of the *graRS* mutant with bacitracin resulted in marked nisin A and nukacin ISK-1 resistance. Additionally, we obtained the same result when *S. aureus* cells were pretreated with nisin A (data not shown). Furthermore, similar results were obtained using the *VraDE* overexpression strain (Table 4). Therefore, the different results of the direct and co-culture methods using the *graRS* mutant were due to the different *VraDE* expression levels upon exposure of *S. aureus* to a high concentration of nisin A or nukacin ISK-1.

Based on our findings, we propose that BraRS and GraRS have distinct functions in terms of resistance to nisin A and nukacin ISK-1. BraRS is an intrinsic factor for such resistance. However, upon exposure of *S. aureus* to a relatively high level of nisin A or nukacin ISK-1, GraRS is important for resistance until significant induction of *VraDE* expression by BraRS occurs. Therefore, these two TCSs function coordinately in resistance to nisin A and nukacin ISK-1. Furthermore, in addition to these two TCSs, *VraSR* is independently activated upon inhibition of cell wall biosynthesis. Class I bacteriocins, such as nisin A and nukacin ISK-1 inhibit cell wall biosynthesis, although increased expression of *VraSR* was identified only in *S. aureus* cells exposed to nukacin ISK-1. Our results strongly indicate that *S. aureus* possesses three distinct class-I-bacteriocin-resistance systems.

In conclusion, we demonstrated that several TCSs and ABC transporters in *S. aureus* are associated with resistance to bacteriocins produced by other bacteria. Notably, *S. aureus* possesses multiple TCSs that resist nisin A and nukacin ISK-1 (Figure 4). In particular, the BraRS system is specific for nisin A and nukacin ISK-1. Conversely, GraRS and *VraSR* confer broad-spectrum resistance against cationic peptides and cell-wall synthesis inhibitors, respectively. Our findings suggest that *S. aureus* possesses several TCSs that facilitate its survival in complex bacterial communities.

## Supporting Information

**Figure S1 Method for the co-culture experiment.** (TIF)

**Figure S2 Susceptibility of TCS- and ABC transporter-inactivated mutants to nukacin ISK-1 and nisin A.** The susceptibilities of *S. aureus* MW2 and its TCS- or ABC transporter-mutants to nukacin ISK-1 and nisin A were evaluated by the direct method. (A) In total, 2  $\mu$ l of overnight cultures of bacteriocin-producing strains were spotted on an MRS agar plate. After overnight incubation at 37°C, pre-warmed MRS soft agar (0.75%) containing *S. aureus* was poured over the surface of the MRS agar plate. Plates were incubated for 20 h at 37°C. (B) The diameters of the inhibition zones surrounding the bacteriocin-producing strain were measured in three directions. Three experiments were performed independently, and the average result of the three experiments was calculated. \*, statistically significant difference from the wild-type as tested using Dunnett's method ( $p < 0.05$ ). The error bar represents the standard deviation. (TIF)



**Figure S3 Expression of TCSs and ABC transporters in *S. aureus* exposed to nisin A.** (TIF)

**Figure S4 Co-culture of *S. aureus* with *L. lactis*.** Co-culture experiment was performed as described in the Materials and Methods. (A) Percent ratio of the *S. aureus* population when mixed with various concentrations of *L. lactis* ATCC 11454 and nisin A-non-producing *L. lactis* NZ9000. (B) Expression of ABC transporters (*braA* and *vraD*) when mixed with various concentrations of *L. lactis* ATCC 11454. \* $p < 0.05$ , as determined by Dunnett's method for expression of the ABC transporters (*braA* and *vraD*). (TIF)

## References

- Cotter PD, Hill C, Ross RP (2005) Bacteriocins: developing innate immunity for food. *Nat Rev Microbiol* 3: 777–788.
- Nissen-Meyer J, Nes IF (1997) Ribosomally synthesized antimicrobial peptides: their function, structure, biogenesis, and mechanism of action. *Arch Microbiol* 167: 67–77.
- Asaduzzaman SM, Sonomoto K (2009) Lantibiotics: diverse activities and unique modes of action. *J Biosci Bioeng* 107: 475–487.
- Klaenhammer TR (1993) Genetics of bacteriocins produced by lactic acid bacteria. *FEMS Microbiol Rev* 12: 39–85.
- Nissen-Meyer J, Rogne P, Oppegard C, Haugen HS, Kristiansen PE (2009) Structure-function relationships of non-lanthionine containing peptide (class II) bacteriocins produced by gram-positive bacteria. *Curr Pharm Biotechnol* 10: 19–37.
- Jung G (1991) Lantibiotics: a survey, p. 1–34. In G. Jung and H.-G. Sahl (ed.), *Nisin and novel lantibiotics*. ESCOM, Leiden, The Netherlands.
- Hyde AJ, Parisot J, McNichol A, Bonev BB (2006) Nisin-induced changes in *Bacillus* morphology suggest a paradigm of antibiotic action. *Proc Natl Acad Sci USA* 103: 19896–19901.
- Wiedemann I, Breukink E, van Kraaij C, Kuipers OP, Bierbaum G et al. (2001) Specific binding of nisin to the peptidoglycan precursor lipid II combines pore formation and inhibition of cell wall biosynthesis for potent antibiotic activity. *J Biol Chem* 276: 1772–1779.
- de Kruijff B, van Dam V, Breukink E (2008) Lipid II: a central component in bacterial cell wall synthesis and a target for antibiotics. *Prostaglandins Leukot Essent Fatty Acids* 79: 117–121.
- Islam MR, Nishie M, Nagao J, Zendo T, Keller S et al. (2012) Ring A of nukacin ISK-1: a lipid II-binding motif for type-A(II) lantibiotic. *J Am Chem Soc* 134: 3687–3690.
- Asaduzzaman SM, Nagao J, Iida H, Zendo T, Nakayama J et al. (2009) Nukacin ISK-1, a bacteriostatic lantibiotic. *Antimicrob Agents Chemother* 53: 3595–3598.
- Foster TJ (2004) The *Staphylococcus aureus* “superbug”. *J Clin Invest* 114: 1693–1696.
- Lowy FD (1998) *Staphylococcus aureus* infections. *New Engl J Med* 339: 520–532.
- Manders SM (1998) Toxin-mediated streptococcal and staphylococcal disease. *J Am Acad Dermatol* 39: 383–398.
- Deurenberg RH, Vink C, Kalenic S, Friedrich AW, Bruggeman CA et al. (2007) The molecular evolution of methicillin-resistant *Staphylococcus aureus*. *Clin Microbiol Infect* 13: 222–235.
- Grundmann H, Aires-de-Sousa M, Boyce J, Tiemersma E (2006) Emergence and resurgence of methicillin-resistant *Staphylococcus aureus* as a public-health threat. *Lancet* 368: 874–875.
- Gardete S, Wu SW, Gill S, Tomasz A (2006) Role of *VraSR* in antibiotic resistance and antibiotic-induced stress response in *Staphylococcus aureus*. *Antimicrob Agents Chemother* 50: 3424–3434.
- Matsuo M, Kato F, Oogai Y, Kawai T, Sugai M et al. (2010) Distinct two-component systems in methicillin-resistant *Staphylococcus aureus* can change the susceptibility to antibacterial agents. *J Antimicrob Chemother* 65: 1536–1537.
- Meehl M, Herbert S, Götz F, Cheung A (2007) Interaction of the *GraRS* two-component system with the *VraFG* ABC transporter to support vancomycin-intermediate resistance in *Staphylococcus aureus*. *Antimicrob Agents Chemother* 51: 2679–2689.
- Sakoulas G, Eliopoulos GM, Moellering RC Jr., Wennersten C, Venkataraman L et al. (2002) Accessory gene regulator (*agr*) locus in geographically diverse *Staphylococcus aureus* isolates with reduced susceptibility to vancomycin. *Antimicrob Agents Chemother* 46: 1492–1502.
- Eguchi Y, Utsumi R (2008) Introduction to bacterial signal transduction networks. *Adv Exp Med Biol* 631: 1–6.
- Mitrophanov AY, Groisman EA (2008) Signal integration in bacterial two-component regulatory systems. *Genes Dev* 22: 2601–2611.
- Yoshida Y, Matsuo M, Oogai Y, Kato F, Nakamura N et al. (2011) Bacitracin sensing and resistance in *Staphylococcus aureus*. *FEMS Microbiol Lett* 320: 33–39.

**Figure S5 Structures of nisin A and nukacin ISK-1.** (A) nisin A; (B) nukacin ISK-1. Shaded residues indicate amino acids: A-S-A, lanthionine; Abu-S-A, 3-methylanthionine; Dha, dehydroalanine; Dhb, dehydrobutyrine; fM, *N*-formylmethionine. (TIF)

**Table S1**  
(DOCX)

## Author Contributions

Conceived and designed the experiments: HK MK KS NN. Performed the experiments: MK YO TZ JN YN YY. Analyzed the data: MK TZ JN YY. Contributed reagents/materials/analysis tools: MK TZ JN. Wrote the paper: HK KS TZ MK NN.

- Hiron A, Falord M, Valle J, Débarbouillé M, Msadek T (2011) Bacitracin and nisin resistance in *Staphylococcus aureus*: a novel pathway involving the *BraS*/*BraR* two-component system (SA2417/SA2418) and both the *BraD*/*BraE* and *VraD*/*VraE* ABC transporters. *Mol Microbiol* 81: 602–622.
- Blake KL, Randall CP, O'Neill AJ (2011) In vitro studies indicate a high resistance potential for the lantibiotic nisin in *Staphylococcus aureus* and define a genetic basis for nisin resistance. *Antimicrob Agents Chemother* 55: 2362–2368.
- Kolar SL, Nagarajan V, Oszmiana A, Rivera FE, Miller HK et al. (2011) NsaRS is a cell-envelope-stress sensing two-component system of *Staphylococcus aureus*. *Microbiology* 157: 2206–2219.
- Cook HA, Cimiotti JP, Della-Latta P, Saiman L, Larson EL (2007) Antimicrobial resistance patterns of colonizing flora on nurses' hands in the neonatal intensive care unit. *Am J Infect Control* 35: 231–236.
- Nagase N, Sasaki A, Yamashita K, Shimizu A, Wakita Y et al. (2002) Isolation and species distribution of staphylococci from animal and human skin. *J Vet Med Sci* 64: 245–250.
- Komatsuzawa H, Suzuki J, Sugai M, Miyake Y, Suginaka H (1994) The effect of Triton X-100 on the in-vitro susceptibility of methicillin-resistant *Staphylococcus aureus* to oxacillin. *J Antimicrob Chemother* 34: 885–897.
- Fujita K, Ichimasa S, Zendo T, Koga S, Yoneyama F et al. (2007) Structural analysis and characterization of lactacin Q, a novel bacteriocin belonging to a new family of unmodified bacteriocins of gram-positive bacteria. *Appl Environ Microbiol* 73: 2871–2877.
- Aso Y, Okuda K, Nagao J, Kanemasa Y, Thi Bich Phuong N et al. (2005) A novel type of immunity protein, NukH, for the lantibiotic nukacin ISK-1 produced by *Staphylococcus warneri* ISK-1. *Biosci Biotechnol Biochem* 69: 1403–1410.
- Barefoot SF, Klaenhammer TR (1983) Detection and activity of lactacin B, a bacteriocin produced by *Lactobacillus acidophilus*. *Appl Environ Microbiol* 45: 1808–1815.
- Lin WS, Gunneen T, Lee CY (1994) Sequence analysis and molecular characterization of genes required for the biosynthesis of type 1 capsular polysaccharide in *Staphylococcus aureus*. *J Bacteriol* 176: 7005–7016.
- Luong TT, Lee CY (2006) The *arl* locus positively regulates *Staphylococcus aureus* type 5 capsule via an *mgrA*-dependent pathway. *Microbiology* 152: 3123–3131.
- Komatsuzawa H, Fujiwara T, Nishi H, Yamada S, Ohara M et al. (2004) The gate controlling cell wall synthesis in *Staphylococcus aureus*. *Mol Microbiol* 53: 1221–1231.
- Peschel A, Jack RW, Otto M, Collins LV, Staubitz P et al. (2001) *Staphylococcus aureus* resistance to human defensins and evasion of neutrophil killing via the novel virulence factor MprF is based on modification of membrane lipids with l-lysine. *J Exp Med* 193: 1067–1076.
- Manson JM, Keis S, Smith JM, Cook GM (2004) Acquired bacitracin resistance in *Enterococcus faecalis* is mediated by an ABC transporter and a novel regulatory protein, BcrR. *Antimicrob Agents Chemother* 48: 3743–3748.
- Ohki R, Giyanto, Tateno K, Masuyama W, Moriya S et al. (2003) The BceRS two-component regulatory system induces expression of the bacitracin transporter, BceAB, in *Bacillus subtilis*. *Mol Microbiol* 49: 1135–1144.
- Podleske Z, Comino A, Herzog-Velikonja B, Zgur-Bertok D, Komel R et al. (1995) *Bacillus licheniformis* bacitracin-resistance ABC transporter: relationship to mammalian multidrug resistance. *Mol Microbiol* 16: 969–976.
- Ouyang J, Tian XL, Versey J, Wishart A, Li YH (2010) The BceABRS four-component system regulates the bacitracin-induced cell envelope stress in *Streptococcus mutans*. *Antimicrob Agents Chemother* 54: 3895–3906.
- Falord M, Mäder U, Hiron A, Débarbouillé M, Msadek T (2011) Investigation of the *Staphylococcus aureus* *GraSR* regulon reveals novel links to virulence, stress response and cell wall signal transduction pathways. *PLoS One* 6: e21323.
- Li M, Cha DJ, Lai Y, Villaruz AE, Sturdevant DE et al. (2007) The antimicrobial peptide-sensing system *aps* of *Staphylococcus aureus*. *Mol Microbiol* 66: 1136–1147.
- Matsuo M, Oogai Y, Kato F, Sugai M, Komatsuzawa H (2011) Growth-phase dependence of susceptibility to antimicrobial peptides in *Staphylococcus aureus*. *Microbiology* 157: 1786–1797.

44. Peschel A, Otto M, Jack RW, Kalbacher H, Jung G et al. (1999) Inactivation of the *dlt* operon in *Staphylococcus aureus* confers sensitivity to defensins, protegrins, and other antimicrobial peptides. *J Biol Chem* 274: 8405–8410.
45. Falord M, Karimova G, Hiron A, Msadek T (2012) GraXSR proteins interact with the *VraFG* ABC transporter to form a five component system required for cationic antimicrobial peptide sensing and resistance in *Staphylococcus aureus*. *Antimicrob Agents Chemother* 56: 1047–1058.
46. Kuroda M, Kuroda H, Oshima T, Takeuchi F, Mori H et al. (2003) Two-component system *VraSR* positively modulates the regulation of cell-wall biosynthesis pathway in *Staphylococcus aureus*. *Mol Microbiol* 49: 807–821.
47. Belcheva A, Golemi-Kotra D (2008) A close-up view of the *VraSR* two-component system. A mediator of *Staphylococcus aureus* response to cell wall damage. *J Biol Chem* 283: 12354–12364.
48. McCallum N, Meier PS, Heusser R, Berger-Bächi B (2011) Mutational analyses of open reading frames within the *vraSR* operon and their roles in the cell wall stress response of *Staphylococcus aureus*. *Antimicrob Agents Chemother* 55: 1391–1402.
49. Muthaiyan A, Silverman JA, Jayaswal RK, Wilkinson BJ (2008) Transcriptional profiling reveals that daptomycin induces the *Staphylococcus aureus* cell wall stress stimulon and genes responsive to membrane depolarization. *Antimicrob Agents Chemother* 52: 980–990.
50. Chandrapati S, O'Sullivan DJ (2002) Characterization of the promoter regions involved in galactose- and nisin-mediated induction of the *nisA* gene in *Lactococcus lactis* ATCC 11454. *Mol Microbiol* 46: 467–477.
51. Aso Y, Koga H, Sashihara T, Nagao J, Kanemasa Y et al. (2005) Description of complete DNA sequence of two plasmids from the nukacin ISK-1 producer, *Staphylococcus warneri* ISK-1. *Plasmid* 53: 164–178.
